# Supplementary material
Source: PubMed Central journal article supplement (PMC4352305)
Supplement: NIHMS664062-supplement-Supplementary_Data.pdf [file NIHMS664062-supplement-Supplementary_Data.pdf]

## Supplementary Fig. S1

A

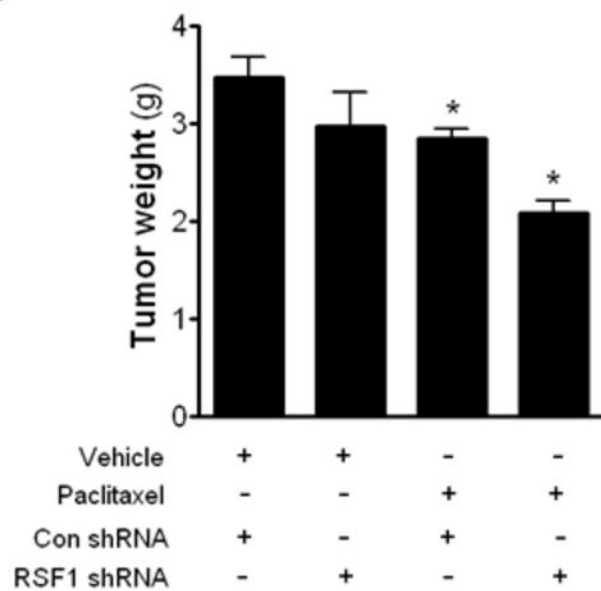

B

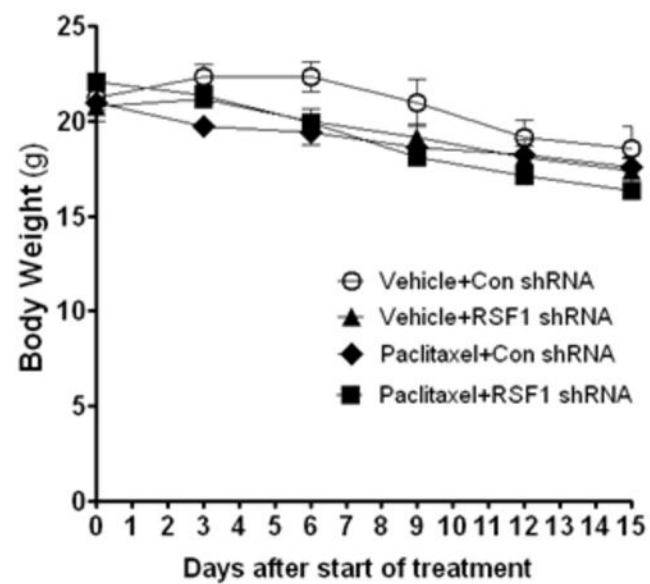

**Supplementary Fig. S2.**

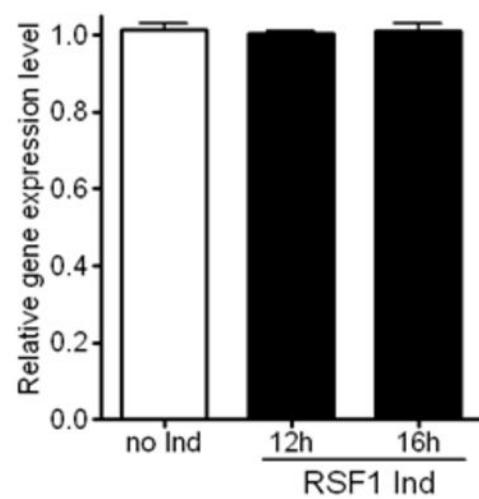

**Supplementary Fig. S3.**

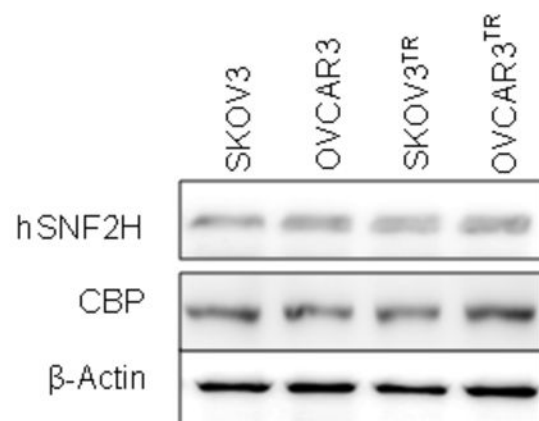

Table S1. Primer sequences for real-time PCR analysis

| <b>Gene</b>   | <b>Sense primer</b>   | <b>Antisense primer</b>  |
|---------------|-----------------------|--------------------------|
| <i>RSF1</i>   | GGCAACGGAGAAGTACCAAAG | TCAAGATAGCCCTTCTTCTCCATC |
| <i>PTGS2</i>  | CTC CCTTGGGTGTCAAAGGT | GTGAAGTGCTGGGCAAAGAA     |
| <i>BCL2</i>   | AAGACTGCTTGGCCCATCTT  | CGCTCAAAGGTTCTTGACCA     |
| <i>CFLAR</i>  | ACCCTCACCTTGTTTCGGAC  | AAATCCAGTTGATCTGGGGC     |
| <i>XIAP</i>   | GGCAGATTATGAAGCACGGA  | GGCTTCCAATCAGTTAGCCC     |
| <i>BCL2L1</i> | TAGGGTGGCCCTTGCA GTTC | GTGAGGCAGCTGAGGCCATA     |
| <i>GAPDH</i>  | GAGTCAACGGATTTGGTCGT  | TTGATTTTGGAGGGATCTCG     |
